# Supplementary material for: Nanocomposites of zirconia@activated carbon derived from a hazelnut shell for the adsorption of tetracyclines from water
Source: Royal Society of Chemistry journal article supplement (doi:10.1039/d2ew00115b), 2022-01-01
Supplement: d2ew00115b1.pdf [file d2ew00115b1.pdf]

**Supplementary Material**

**Nanocomposites of Zirconia@Activated Carbon Derived from  
Hazelnut Shell for Adsorption of Tetracyclines from Water**

Mengya Zhu<sup>1,&</sup>, Ling Zhang<sup>1,&</sup>, Yingfan Chen<sup>1,\*</sup>, Nan You<sup>1,\*</sup>, Hua Shen<sup>2,\*</sup>

(1. College of Petrochemical Engineering, Liaoning Petrochemical University, Fushun 113001, China; 2. College of Science, Shenyang University of Chemical Technology, Shenyang, 100142, China)

& The first two authors contributed equally to this paper

\* Corresponding author

E-mail: twtky2007@163.com (Y. Chen), younan\_77@163.com (N. You) and yywwddssh@163.com (H. Shen)

### ***Materials***

TC, OTC and CTC were purchased from sigma-aldrich. All other reagents used which were of analytical grade, were obtained from Sinopharm Chemical Reagent Co., Shanghai, China, and used as received. The individual stock solutions were prepared by dissolving 1 g of TC, OTC and CTC (individually) in 1 L of distilled water and the desirable concentrations of the three antibiotics in experimental process were prepared by the dilution of stock solution.

### ***Characterization***

The product obtained was characterized by X-ray diffraction using Cu K $\alpha$  radiation (XRD, Almelo PW-3060, Netherland) from  $2\theta$  of 10–90° with 2° scan step, scanning electron microscope (Shimadzu SS 550) equipped with an energy-dispersive X-ray analyzer at 5 keV and a TECNAI G20 transmission electron microscope (TEM, FEI, USA) at 5 keV. The thermogravimetric analysis was obtained by a HCT-2 thermogravimetric analyzer (Beijing Scientific Instrument Factory, China) from 30 to 1000 °C at a heating speed of 10 °C min<sup>-1</sup> using a 20 mL s<sup>-1</sup> flow of air atmosphere. The absorption spectra of the nanocomposites were taken at room temperature by a Nicolet 6700 Fourier transmission infrared spectroscopy (FT-IR) in the range of 400-4000 cm<sup>-1</sup> with a resolution of 1 cm<sup>-1</sup> using KBr window, and by a Raman spectroscopy (Scientific DXR, Thermo) using a laser wavelength of 514.2nm at c.a. 5mW with a 100x objective. All the pH values were measured by a ST20 pH meter (Ohaus Corporation, USA). The specific surface area was measured by N<sub>2</sub> adsorption-desorption at 77 K (Micromeritics ASAP 2020) using Brunauer–Emmet–Teller (BET) isotherms.

### ***Analysis***

Simultaneous determination of OTC, TC and CTC in samples was performed using high-performance liquid chromatography (HPLC) coupled with ultraviolet detection at 355 nm. A Dikma C18 (150×4.6 mm, 5  $\mu$ m particle size) as the chromatograph column was operated at 35°C. The mixture solution of acetonitrile/0.01mol L<sup>-1</sup> of oxalic acid solution in a 30:70 (v/v)

ratio were used as mobile phase at a flow rate of 1.0 mL min<sup>-1</sup>. The injection volume was 20 µL. The details are described in the Supporting Information. Detection limits of TC, OTC and CTC were below 0.004, 0.004 and 0.009 mg L<sup>-1</sup>, respectively. The quantitation limits of TC, OTC and CTC were 0.04, 0.04 and 0.07 mg L<sup>-1</sup>, respectively.

### ***Calculation of adsorption capacity***

$$q = (C_0 - C_t) V/m \quad (S1)$$

where  $q$  (mg g<sup>-1</sup>) is the adsorption capacity,  $C_0$  (mg L<sup>-1</sup>) is the initial concentration of antibiotics,  $C_t$  (mg L<sup>-1</sup>) is the remnant concentration of antibiotics,  $V$  (mL) is the volume of solution and  $m$  (g) is the mass of sorbents.

### ***Adsorption isotherms***

The linearized equations of Langmuir, Freundlich and Dubinin–Radushkevich (D–R) isotherm can be expressed as Eqs. (S1) and (S2), respectively.

$$C_e/q_e = 1/(q_{\max} b) + C_e/q_{\max} \quad (S2)$$

$$\log q_e = \log k_F + (1/n) \log C_e \quad (S3)$$

$$\ln q_e = \ln q_s - k_{\text{ad}} \varepsilon^2 \quad (S4)$$

where  $q_e$  (mg g<sup>-1</sup>) is the amount of antibiotics adsorbed per unit mass of sorbents at equilibrium;  $C_e$  (mg L<sup>-1</sup>) is the concentration at equilibrium;  $q_{\max}$  (mg g<sup>-1</sup>) is the maximum adsorption at monolayer coverage;  $b$  (L mg<sup>-1</sup>) is the adsorption equilibrium constant;  $K_F$  (L g<sup>-1</sup>) is a Freundlich constant;  $n$  is a constant;  $k_{\text{ad}}$  (mol<sup>2</sup> kJ<sup>-2</sup>) is the D–R isotherm constant;  $q_s$  (mg g<sup>-1</sup>) is the saturation capacity from D–R isotherm;  $\varepsilon$  is the Polanyi potential and calculated as follows:

$$\varepsilon = RT \ln (1 + 1/C_{\text{eq}}) \quad (S5)$$

where  $R$  (8.314 J mol<sup>-1</sup> K<sup>-1</sup>) is universal gas constant;  $T$  (K) is the absolute temperature.  $C_{\text{eq}}$  (mol L<sup>-1</sup>) is the equilibrium concentration of adsorbate.

$E$  ( $\text{kJ mol}^{-1}$ ) is the change of free energy transforming 1 mol of adsorbates from solution to the surfaces and is conducive to the estimation of adsorption reaction type, and is obtained from  $k_{\text{ad}}$  as follows:

$$E = -(2k_{\text{ad}})^{-1/2} \quad (\text{S6})$$

### ***Kinetic analysis***

The pseudo-first-order and pseudo-second-order rate expressions are linearly expressed as:

$$\log(q_e - q_t) = \log q_e - k_1 t / 2.303 \quad (\text{S7})$$

$$t/q_t = 1/k_2 q_e^2 + t/q_e \quad (\text{S8})$$

where  $k_1$  ( $\text{min}^{-1}$ ) is the rate constant of the pseudo-first-order adsorption.  $q_e$  and  $q_t$  ( $\text{mg g}^{-1}$ ) are the adsorption capacity at equilibrium and the adsorption amount at time  $t$  (min), respectively.  $k_2$  ( $\text{g mg}^{-1} \text{min}^{-1}$ ) is the rate constant of the pseudo-second-order equation.

The intraparticle diffusion model is linearly expressed as

$$q_t = k_{\text{pi}} t^{0.5} + C_{\text{pi}} \quad (\text{S9})$$

Where  $k_{\text{pi}}$  is the intraparticle diffusion rate constant of stage  $i$  ( $\text{mg g}^{-1} \text{min}^{-0.5}$ ),  $C_{\text{pi}}$ , the intercept of stage  $i$ , gives an idea about the thickness of boundary layer, i.e., the larger of the intercept, the greater of the boundary layer effect.

### ***Thermodynamic analysis***

Thermodynamic parameters such as standard Gibbs free energy change ( $\Delta G^\circ$ ), enthalpy change ( $\Delta H^\circ$ ) and entropy change ( $\Delta S^\circ$ ) at equilibrium at different temperatures can be calculated from the constant ( $b$ ,  $\text{L mol}^{-1}$ ) of Langmuir isotherm equation as the following equations:

$$\Delta G^\circ = -RT \ln b \quad (\text{S10})$$

In order to use  $b$  in the thermodynamic calculations, the value of  $b$  expressed in  $\text{L mg}^{-1}$  in Langmuir isotherm equation can be multiplied by 1000 to convert the units in  $\text{L g}^{-1}$ , and then multiplied by the molecular weight of the antibiotics, to transform  $b$  in  $\text{L mol}^{-1}$ .

$\Delta H^\circ$  and  $\Delta S^\circ$  were obtained from Eq.S10.

$$\ln b = \frac{\Delta S^\circ}{R} - \frac{\Delta H^\circ}{RT} \quad (\text{S11})$$

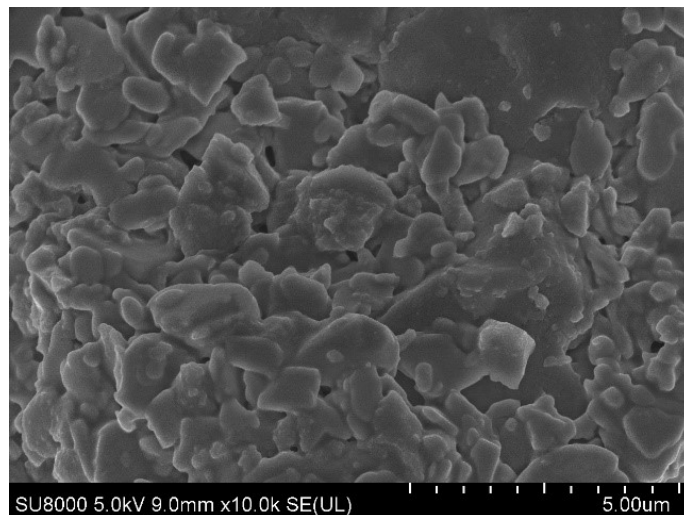

**Figure S1** SEM image of the AC.

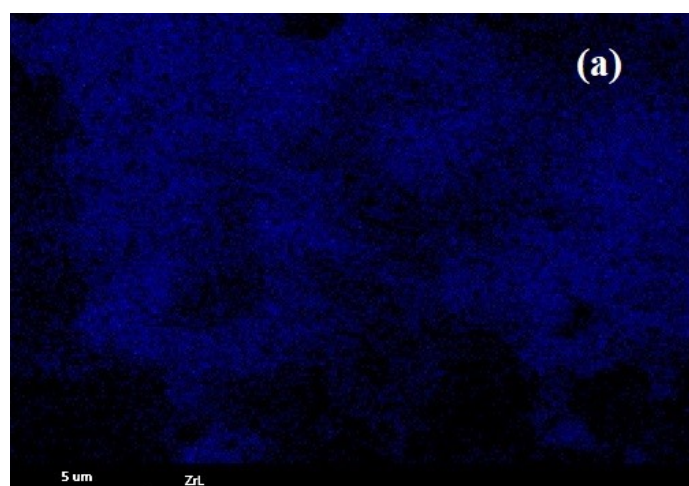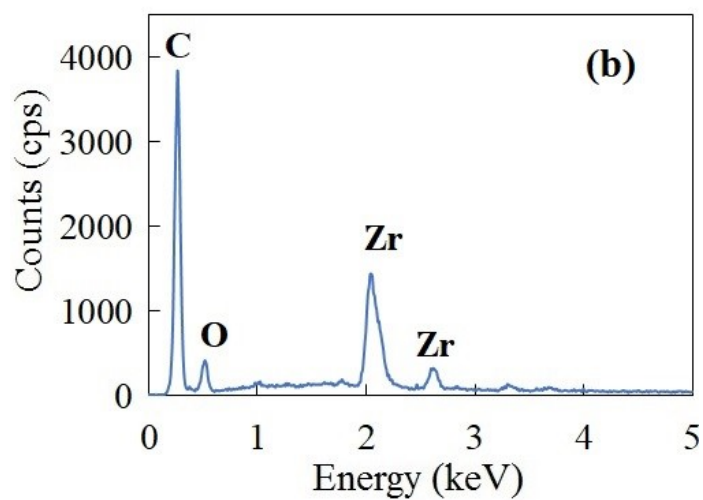

**Figure S2** EDS spectra of the ZrO<sub>2</sub>@AC.

**Table S1** Physic-chemical parameters of the culture wastewater

| Measured parameters                                            | Culture wastewater |
|----------------------------------------------------------------|--------------------|
| Conductivity ( $\mu\text{s cm}^{-1}$ ) <sup>a</sup>            | 2997               |
| Salinity (ppt) <sup>a</sup>                                    | 1.5                |
| Oxidation-reduction potential (mV) <sup>a</sup>                | 487                |
| Total dissolved solids ( $\text{mg L}^{-1}$ ) <sup>a</sup>     | 1243               |
| Dissolved organic carbon ( $\text{mg C L}^{-1}$ ) <sup>b</sup> | 32.2±2.9           |
| Chemical oxygen demand ( $\text{mg L}^{-1}$ ) <sup>c</sup>     | 789.6±55.7         |
| pH                                                             | 8.7±0.1            |
| TC ( $\text{mg L}^{-1}$ )                                      | N.D. <sup>d</sup>  |
| OTC ( $\text{mg L}^{-1}$ )                                     | N.D.               |
| CTC ( $\text{mg L}^{-1}$ )                                     | 2.3                |

<sup>a</sup> Conductivity, salinity, oxidation-reduction potential and total dissolved solids were measured by pen conductivity meter (ST10C-B), pen salinity meter (ST20S), pen ORP meter (ST10R) and pen TDS meter (ST10T-B), respectively (Ohaus, Canada).

<sup>b</sup> Dissolved organic carbon was measured using a TOC analyzer (Dohrmanne DC-190, GE, USA).

<sup>c</sup> Chemical oxygen demand was measured by potassium dichromate method.

<sup>d</sup> N.D. means not detected.
